# Supplementary material
Source: PubMed Central journal article supplement (PMC8461570)

Disclosure Purpose: 21-10345

## Summary of Interests

### Company or Organization

| Entity                                                                  | Type       | Interest Held By             |
|-------------------------------------------------------------------------|------------|------------------------------|
| Pfizer                                                                  | Employment | Self                         |
| <i>Title:</i> Senior Medical Director<br><i>Additional Information:</i> |            | <i>Position Description:</i> |
| Pfizer                                                                  | Stock      | Self                         |
| <i>Additional Information:</i>                                          |            |                              |

## Additional Questions:

1. **Are there other relationships or activities that readers could perceive to have influenced, or that give the appearance of potentially influencing, what you wrote in the submitted work?**

No.

2. **What is the manuscript title?**

Six Month Safety and Efficacy of the BNT162b2 mRNA COVID-19 Vaccine

3. **Are you the corresponding author?**

Yes.

a. **Please list the other authors' names here.**

Stephen J. Thomas, M.D., Edson D. Moreira Jr., M.D., Nicholas Kitchin, M.D., Judith Absalon, M.D., Alejandra Gurtman, M.D., Stephen Lockhart, D.M., John L. Perez, M.D., Gonzalo Pérez Marc, M.D., Fernando P. Polack, M.D., Cristiano Zerbini, M.D., Ruth Bailey, B.Sc., Kena A. Swanson, Ph.D., Xia Xu, Ph.D., Satrajit Roychoudhury, Ph.D., Kenneth Koury, Ph.D., Salim Bouguermouh, M.D., Ph.D., Warren V. Kalina, Ph.D., David Cooper, Ph.D., Robert W. Frencck, Jr., M.D., Laura L. Hammitt, M.D., Özlem Türeci, M.D., Haylene Nell, M.D., Axel Schaefer, M.D., Serhat Únal, M.D., Qi Yang, Ph.D., Paul Liberator, Ph.D., Dina B. Tresnan, D.V.M., Ph.D., Susan Mather, M.D., Philip R. Dormitzer, M.D., Ph.D., Uğur Şahin, M.D.; William C. Gruber, M.D., Kathrin U. Jansen, Ph.D.

## Certification

I certify that the information provided in this disclosure is complete and accurate.

Disclosure Purpose: 21-10345

Summary of Interests

**Company or Organization**

| Entity                                                   | Type       | Interest Held By                                |
|----------------------------------------------------------|------------|-------------------------------------------------|
| Pfizer                                                   | Employment | Self                                            |
| <i>Title:</i> Director<br><i>Additional Information:</i> |            | <i>Position Description:</i> Clinical Scientist |
| Pfizer                                                   | Stock      | Self                                            |
| <i>Additional Information:</i>                           |            |                                                 |

Additional Questions:

- Are there other relationships or activities that readers could perceive to have influenced, or that give the appearance of potentially influencing, what you wrote in the submitted work?**  
No.
- What is the manuscript title?**  
Six Month Safety and Efficacy of the BNT162b2 mRNA COVID-19 Vaccine
- Are you the corresponding author?**  
No.

Certification

I certify that the information provided in this disclosure is complete and accurate.

**Disclosure Purpose:** 21-10345

## Summary of Interests

| Company or Organization                            |            |                                                                                                                        |
|----------------------------------------------------|------------|------------------------------------------------------------------------------------------------------------------------|
| Entity                                             | Type       | Interest Held By                                                                                                       |
| Pfizer                                             | Employment | Self                                                                                                                   |
| <i>Title:</i> Associate Director Clinical Research |            | <i>Position Description:</i> Provide medical and scientific expertise and oversight for global clinical vaccine trials |
| <i>Additional Information:</i>                     |            |                                                                                                                        |
| Pfizer                                             | Other      | Self                                                                                                                   |
| <i>Category:</i> Other                             |            | <i>Description:</i> Medical monitor                                                                                    |
| <i>Additional Information:</i>                     |            |                                                                                                                        |
| Pfizer                                             | Stock      | Self                                                                                                                   |
| <i>Additional Information:</i>                     |            |                                                                                                                        |

## Additional Questions:

- Are there other relationships or activities that readers could perceive to have influenced, or that give the appearance of potentially influencing, what you wrote in the submitted work?**  
No.
- What is the manuscript title?**  
Six Month Safety and Efficacy of the BNT162b2 mRNA COVID-19 Vaccine
- Are you the corresponding author?**  
No.

## Certification

I certify that the information provided in this disclosure is complete and accurate.

Disclosure Purpose: 21-10345

Summary of Interests

**Company or Organization**

| Entity                                                             | Type         | Interest Held By                                |
|--------------------------------------------------------------------|--------------|-------------------------------------------------|
| Pfizer                                                             | Employment   | Self                                            |
| <i>Title:</i> Executive Director<br><i>Additional Information:</i> |              | <i>Position Description:</i> Vaccine Researcher |
| Pfizer                                                             | Stock        | Self                                            |
| <i>Additional Information:</i>                                     |              |                                                 |
| Pfizer                                                             | Stock Option | Self                                            |
| <i>Additional Information:</i>                                     |              |                                                 |

Additional Questions:

- Are there other relationships or activities that readers could perceive to have influenced, or that give the appearance of potentially influencing, what you wrote in the submitted work?**  
No.
- What is the manuscript title?**  
Six Month Safety and Efficacy of the BNT162b2 mRNA COVID-19 Vaccine
- Are you the corresponding author?**  
No.

Certification

I certify that the information provided in this disclosure is complete and accurate.

**Disclosure Purpose:** 21-10345

## Summary of Interests

| Company or Organization                                                                                            |              |                              |
|--------------------------------------------------------------------------------------------------------------------|--------------|------------------------------|
| Entity                                                                                                             | Type         | Interest Held By             |
| Pfizer                                                                                                             | Employment   | Self                         |
| <i>Title:</i> Vice President and Chief Scientific Officer Viral and RNA Vaccines<br><i>Additional Information:</i> |              | <i>Position Description:</i> |
| Pfizer                                                                                                             | Stock Option | Self                         |
| <i>Additional Information:</i>                                                                                     |              |                              |

## Additional Questions:

- Are there other relationships or activities that readers could perceive to have influenced, or that give the appearance of potentially influencing, what you wrote in the submitted work?**  
No.
- What is the manuscript title?**  
Six Month Safety and Efficacy of the BNT162b2 mRNA COVID-19 Vaccine
- Are you the corresponding author?**  
No.

## Certification

I certify that the information provided in this disclosure is complete and accurate.

Disclosure Purpose: 21-10345

Summary of Interests

**Company or Organization**

| Entity | Type             | Interest Held By |
|--------|------------------|------------------|
| Pfizer | Grant / Contract | Self             |

*Recipient Name:* Cincinnati Children's Hospital Medical Center  
*Grant / Contract Description:* Clinical Trial grant for COVID-19 vaccines  
*Additional Information:*

*Recipient Type:* Institution  
*Grant / Contract Purpose:* Research

Additional Questions:

- Are there other relationships or activities that readers could perceive to have influenced, or that give the appearance of potentially influencing, what you wrote in the submitted work?  
No.
- What is the manuscript title?  
Safety, Immunogenicity, and Efficacy of the BNT162b2 COVID-19 Vaccine in Adolescents
- Are you the corresponding author?  
No.

Certification

I certify that the information provided in this disclosure is complete and accurate.

Disclosure Purpose: 21-10345

Summary of Interests

**Company or Organization**

| Entity                              | Type         | Interest Held By                                                                                                  |
|-------------------------------------|--------------|-------------------------------------------------------------------------------------------------------------------|
| Pfizer                              | Employment   | Self                                                                                                              |
| <i>Title:</i> Senior Vice President |              | <i>Position Description:</i> Vaccine Clinical Research and Development Worldwide Research Development and Medical |
| <i>Additional Information:</i>      |              |                                                                                                                   |
| Pfizer                              | Stock        | Self                                                                                                              |
| <i>Additional Information:</i>      |              |                                                                                                                   |
| Pfizer                              | Stock Option | Self                                                                                                              |
| <i>Additional Information:</i>      |              |                                                                                                                   |

Additional Questions:

- Are there other relationships or activities that readers could perceive to have influenced, or that give the appearance of potentially influencing, what you wrote in the submitted work?**  
No.
- What is the manuscript title?**  
Six Month Safety and Efficacy of the BNT162b2 mRNA COVID-19 Vaccine
- Are you the corresponding author?**  
No.

Certification

I certify that the information provided in this disclosure is complete and accurate.

Disclosure Purpose: 21-10345

Summary of Interests

**Company or Organization**

| Entity                                                     | Type       | Interest Held By             |
|------------------------------------------------------------|------------|------------------------------|
| Pfizer                                                     | Employment | Self                         |
| <i>Title:</i> VP Vaccine Clinical Research and Development |            | <i>Position Description:</i> |
| <i>Additional Information:</i>                             |            |                              |

Additional Questions:

- Are there other relationships or activities that readers could perceive to have influenced, or that give the appearance of potentially influencing, what you wrote in the submitted work?**  
No.
- What is the manuscript title?**  
Six Month Safety and Efficacy of the BNT162b2 mRNA COVID-19 Vaccine
- Are you the corresponding author?**  
No.

Certification

I certify that the information provided in this disclosure is complete and accurate.

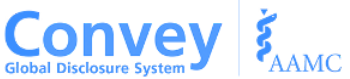



Disclosure Purpose: 21-10345

Summary of Interests

**Company or Organization**

| Entity                                                                                                                                                                          | Type             | Interest Held By                                                                |
|---------------------------------------------------------------------------------------------------------------------------------------------------------------------------------|------------------|---------------------------------------------------------------------------------|
| <a href="#">MedImmune</a>                                                                                                                                                       | Grant / Contract | Other - Institution                                                             |
| <i>Recipient Name:</i> Johns Hopkins Bloomberg Center for Public Health<br><i>Grant / Contract Description:</i> RSV prevention clinical trial<br><i>Additional Information:</i> |                  | <i>Recipient Type:</i> Institution<br><i>Grant / Contract Purpose:</i> Research |
| <a href="#">Novavax</a>                                                                                                                                                         | Grant / Contract | Other - Institution                                                             |
| <i>Recipient Name:</i> Johns Hopkins Bloomberg Center for Public Health<br><i>Grant / Contract Description:</i> RSV vaccine clinical trial<br><i>Additional Information:</i>    |                  | <i>Recipient Type:</i> Institution<br><i>Grant / Contract Purpose:</i> Research |
| <a href="#">Pfizer</a>                                                                                                                                                          | Grant / Contract | Other - Institution                                                             |
| <i>Recipient Name:</i> Johns Hopkins Bloomberg Center for Public Health<br><i>Grant / Contract Description:</i> COVID-19 vaccine trial<br><i>Additional Information:</i>        |                  | <i>Recipient Type:</i> Institution<br><i>Grant / Contract Purpose:</i> Research |

Additional Questions:

- Are there other relationships or activities that readers could perceive to have influenced, or that give the appearance of potentially influencing, what you wrote in the submitted work?**  
No.
- What is the manuscript title?**  
Six Month Safety and Efficacy of the BNT162b2 mRNA COVID-19 Vaccine
- Are you the corresponding author?**  
No.

Certification

I certify that the information provided in this disclosure is complete and accurate.

Disclosure Purpose: 21-10345

Summary of Interests

**Company or Organization**

| Entity                                                                                 | Type       | Interest Held By                                 |
|----------------------------------------------------------------------------------------|------------|--------------------------------------------------|
| Pfizer                                                                                 | Employment | Self                                             |
| <i>Title:</i> SVP and Head of vaccine R&D<br><i>Additional Information:</i>            |            | <i>Position Description:</i> head of vaccine R&D |
| Pfizer                                                                                 | Stock      | Self                                             |
| <i>Additional Information:</i> as a Pfizer employee i hold PFE stock and stock options |            |                                                  |

Additional Questions:

- Are there other relationships or activities that readers could perceive to have influenced, or that give the appearance of potentially influencing, what you wrote in the submitted work?**  
No.
- What is the manuscript title?**  
Six Month Safety and Efficacy of the BNT162b2 mRNA COVID-19 Vaccine
- Are you the corresponding author?**  
No.

Certification

I certify that the information provided in this disclosure is complete and accurate.

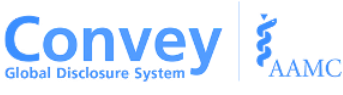

Disclosure Purpose: 21-10345

Summary of Interests

**Company or Organization**

| Entity                                                          | Type       | Interest Held By             |
|-----------------------------------------------------------------|------------|------------------------------|
| Pfizer                                                          | Employment | Self                         |
| <i>Title:</i> Senior Director<br><i>Additional Information:</i> |            | <i>Position Description:</i> |
| Pfizer                                                          | Stock      | Self                         |
| <i>Additional Information:</i>                                  |            |                              |

Additional Questions:

- Are there other relationships or activities that readers could perceive to have influenced, or that give the appearance of potentially influencing, what you wrote in the submitted work?**  
No.
- What is the manuscript title?**  
Six Month Safety and Efficacy of the BNT162b2 mRNA COVID-19 Vaccine
- Are you the corresponding author?**  
No.

Certification

I certify that the information provided in this disclosure is complete and accurate.

**Disclosure Purpose:** 21-10345

## Summary of Interests

| Company or Organization                                                            |              |                                                                        |
|------------------------------------------------------------------------------------|--------------|------------------------------------------------------------------------|
| Entity                                                                             | Type         | Interest Held By                                                       |
| Pfizer                                                                             | Employment   | Self                                                                   |
| <i>Title:</i> Senior Director<br><i>Additional Information:</i> Full time employee |              | <i>Position Description:</i> Vaccine Clinical Research and Development |
| Pfizer                                                                             | Stock        | Self                                                                   |
| <i>Additional Information:</i>                                                     |              |                                                                        |
| Pfizer                                                                             | Stock Option | Self                                                                   |
| <i>Additional Information:</i>                                                     |              |                                                                        |

## Additional Questions:

- Are there other relationships or activities that readers could perceive to have influenced, or that give the appearance of potentially influencing, what you wrote in the submitted work?**  
No.
- What is the manuscript title?**  
Six Month Safety and Efficacy of the BNT162b2 mRNA COVID-19 Vaccine
- Are you the corresponding author?**  
No.

## Certification

I certify that the information provided in this disclosure is complete and accurate.

**Disclosure Purpose:** 21-10345

## Summary of Interests

| Company or Organization                                            |            |                                                                                                         |
|--------------------------------------------------------------------|------------|---------------------------------------------------------------------------------------------------------|
| Entity                                                             | Type       | Interest Held By                                                                                        |
| Pfizer                                                             | Employment | Self                                                                                                    |
| <i>Title:</i> Executive Director<br><i>Additional Information:</i> |            | <i>Position Description:</i> Head of Statistics and Modeling, Vaccine Clinical Research and Development |
| Pfizer                                                             | Stock      | Self                                                                                                    |
| <i>Additional Information:</i>                                     |            |                                                                                                         |

## Additional Questions:

- Are there other relationships or activities that readers could perceive to have influenced, or that give the appearance of potentially influencing, what you wrote in the submitted work?**  
No.
- What is the manuscript title?**  
Six Month Safety and Efficacy of the BNT162b2 COVID-19 Vaccine
- Are you the corresponding author?**  
No.

## Certification

I certify that the information provided in this disclosure is complete and accurate.

**Disclosure Purpose:** 21-10345

## Summary of Interests

| Company or Organization                                         |            |                                                               |
|-----------------------------------------------------------------|------------|---------------------------------------------------------------|
| Entity                                                          | Type       | Interest Held By                                              |
| Pfizer                                                          | Employment | Self                                                          |
| <i>Title:</i> Senior Director<br><i>Additional Information:</i> |            | <i>Position Description:</i> Vaccine Research and Development |

## Additional Questions:

- Are there other relationships or activities that readers could perceive to have influenced, or that give the appearance of potentially influencing, what you wrote in the submitted work?**  
No.
- What is the manuscript title?**  
Six Month Safety and Efficacy of the BNT162b2 mRNA COVID-19 Vaccine
- Are you the corresponding author?**  
No.

## Certification

I certify that the information provided in this disclosure is complete and accurate.

**Disclosure Purpose:** 21-10345

## Summary of Interests

| Company or Organization                                        |              |                                                                                      |
|----------------------------------------------------------------|--------------|--------------------------------------------------------------------------------------|
| Entity                                                         | Type         | Interest Held By                                                                     |
| Pfizer                                                         | Employment   | Self                                                                                 |
| <i>Title:</i> Vice President<br><i>Additional Information:</i> |              | <i>Position Description:</i> Clinical Research Head Vaccines Europe and Asia Pacific |
| Pfizer                                                         | Stock        | Self                                                                                 |
| <i>Additional Information:</i>                                 |              |                                                                                      |
| Pfizer                                                         | Stock Option | Self                                                                                 |
| <i>Additional Information:</i>                                 |              |                                                                                      |

## Additional Questions:

- Are there other relationships or activities that readers could perceive to have influenced, or that give the appearance of potentially influencing, what you wrote in the submitted work?**  
No.
- What is the manuscript title?**  
Six Month Safety and Efficacy of the BNT162b2 mRNA COVID-19 Vaccine
- Are you the corresponding author?**  
No.

## Certification

I certify that the information provided in this disclosure is complete and accurate.

**Disclosure Purpose:** 21-10345

## Summary of Interests

| Company or Organization                                                             |            |                                               |
|-------------------------------------------------------------------------------------|------------|-----------------------------------------------|
| Entity                                                                              | Type       | Interest Held By                              |
| Pfizer                                                                              | Employment | Self                                          |
| <i>Title:</i> Senior Director<br><i>Additional Information:</i>                     |            | <i>Position Description:</i> Safety physician |
| Pfizer                                                                              | Stock      | Self                                          |
| <i>Additional Information:</i> Stock and stock options based on employment policies |            |                                               |

## Additional Questions:

- Are there other relationships or activities that readers could perceive to have influenced, or that give the appearance of potentially influencing, what you wrote in the submitted work?**  
No.
- What is the manuscript title?**  
Six Month Safety and Efficacy of the BNT162b2 mRNA COVID-19 Vaccine
- Are you the corresponding author?**  
No.

## Certification

I certify that the information provided in this disclosure is complete and accurate.



**Disclosure Purpose:** 21-10345

### Summary of Interests

I do not have any interests to disclose at this time.

### Additional Questions:

- Are there other relationships or activities that readers could perceive to have influenced, or that give the appearance of potentially influencing, what you wrote in the submitted work?**  
No.
- What is the manuscript title?**  
Six Month Safety and Efficacy of the BNT162b2 mRNA COVID-19 Vaccine
- Are you the corresponding author?**  
No.

### Certification

I certify that the information provided in this disclosure is complete and accurate.

**Disclosure Purpose:** 21-10345

### Summary of Interests

I do not have any interests to disclose at this time.

### Additional Questions:

- Are there other relationships or activities that readers could perceive to have influenced, or that give the appearance of potentially influencing, what you wrote in the submitted work?**  
No.
- What is the manuscript title?**  
Six Month Safety and Efficacy of the BNT162b2 mRNA COVID-19 Vaccine
- Are you the corresponding author?**  
No.

### Certification

I certify that the information provided in this disclosure is complete and accurate.

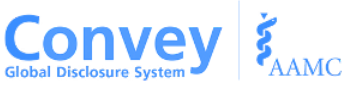

Disclosure Purpose: 21-10345

Summary of Interests

**Company or Organization**

| Entity                                                               | Type       | Interest Held By             |
|----------------------------------------------------------------------|------------|------------------------------|
| Pfizer                                                               | Employment | Self                         |
| <i>Title:</i> Vice President Vaccine Clinical Research & Development |            | <i>Position Description:</i> |
| <i>Additional Information:</i>                                       |            |                              |

**Intellectual Property**

| Type                                                  | Is Licensed                               | Interest Held By |
|-------------------------------------------------------|-------------------------------------------|------------------|
| Patent - Meningococcal Pentavalent vaccine            | No                                        | Self             |
| <i>Description:</i> Meningococcal Pentavalent vaccine | <i>Patent Number:</i> 10,813,989 B2       |                  |
| <i>Patent Status:</i> Issued                          | <i>Patent Holder:</i> Current Institution |                  |
| <i>Filing Jurisdiction:</i> USA                       |                                           |                  |
| <i>Licensees:</i>                                     | <i>Additional Information:</i>            |                  |

Additional Questions:

- Are there other relationships or activities that readers could perceive to have influenced, or that give the appearance of potentially influencing, what you wrote in the submitted work?**  
No.
- What is the manuscript title?**  
Safety, Immunogenicity, and Efficacy of the BNT162b2 COVID-19 Vaccine in Adolescents
- Are you the corresponding author?**  
No.

Certification

I certify that the information provided in this disclosure is complete and accurate.

Disclosure Purpose: 21-10345

## Summary of Interests

| Company or Organization                                                                     | Type       | Interest Held By                                |
|---------------------------------------------------------------------------------------------|------------|-------------------------------------------------|
| <b>iTrials SA</b><br><i>Additional Information:</i> scientific site management organization | Stock      | Self                                            |
| <b>Janssen Biotech</b><br><i>Category:</i> Consultant<br><i>Additional Information:</i>     | Consultant | Self<br><i>Description:</i> consultation on RSV |
| <b>Merck</b><br><i>Category:</i> Consultant<br><i>Additional Information:</i>               | Consultant | Self<br><i>Description:</i> consultation on RSV |
| <b>Novavax, INC</b><br><i>Category:</i> Consultant<br><i>Additional Information:</i>        | Consultant | Self<br><i>Description:</i> consultation on RSV |

## Additional Questions:

- Are there other relationships or activities that readers could perceive to have influenced, or that give the appearance of potentially influencing, what you wrote in the submitted work?**  
No.
- What is the manuscript title?**  
Six Month Safety and Efficacy of the BNT162b2 mRNA COVID-19 Vaccine
- Are you the corresponding author?**  
No.

## Certification

I certify that the information provided in this disclosure is complete and accurate.

Disclosure Purpose: 21-10345

## Summary of Interests

### Company or Organization

| Entity                                                                                                                                                                                                                                                                                                                                                                                                                                               | Type  | Interest Held By                    |
|------------------------------------------------------------------------------------------------------------------------------------------------------------------------------------------------------------------------------------------------------------------------------------------------------------------------------------------------------------------------------------------------------------------------------------------------------|-------|-------------------------------------|
| <a href="#">Boehringer Ingelheim</a>                                                                                                                                                                                                                                                                                                                                                                                                                 | Other | Self                                |
| <b>Category:</b> Other<br><b>Additional Information:</b> Phase III. Pulmonary Fibrosis treatment in adolescents. As Principal Investigator. I have signed an FDA FORM 1572 and received funds.                                                                                                                                                                                                                                                       |       | <b>Description:</b> Clinical Trial  |
| <a href="#">Janssen Biotech</a>                                                                                                                                                                                                                                                                                                                                                                                                                      | Other | Self                                |
| <b>Category:</b> Other<br><b>Additional Information:</b> Pediatric RSV antiviral treatment. Principal Investigator. - I have signed a FDA Form 1572 or an Investigator Agreement. - I have received funds and compensation to attend to an investigator meeting.                                                                                                                                                                                     |       | <b>Description:</b> Clinical Trial  |
| <a href="#">Medicago</a>                                                                                                                                                                                                                                                                                                                                                                                                                             | Other | Self                                |
| <b>Category:</b> Other<br><b>Additional Information:</b> SARS COV-2 vaccine against COVID-19. Principal Investigator. I have signed a FDA Form 1572 or an Investigator Agreement. I receive funds.                                                                                                                                                                                                                                                   |       | <b>Description:</b> Clinical Trial  |
| <a href="#">Merck</a>                                                                                                                                                                                                                                                                                                                                                                                                                                | Other | Self                                |
| <b>Category:</b> Other<br><b>Additional Information:</b> Anti-RSV Antibody in Newborns. Sub-Investigator. I have signed a FDA Form 1572 or an Investigator Agreement. I have received funds.                                                                                                                                                                                                                                                         |       | <b>Description:</b> Clinical Trial  |
| <a href="#">Pfizer</a>                                                                                                                                                                                                                                                                                                                                                                                                                               | Other | Self                                |
| <b>Category:</b> Other<br><b>Additional Information:</b> 1. Anti-RSV vaccine in pregnant women. Principal Investigator (2021-?) 2. Pediatric Antireflux treatment. Principal Investigator. (2019-?) 3. SARS COV-2 RNA vaccine against COVID19. Sub-Investigator. (2021-?) - In every study I have signed a FDA Form 1572 or an Investigator Agreement. - In every study I have received funds and compensation to attend to an investigator meeting. |       | <b>Description:</b> Clinical Trials |

## Additional Questions:

- Are there other relationships or activities that readers could perceive to have influenced, or that give the appearance of potentially influencing, what you wrote in the submitted work?**  
No.
- What is the manuscript title?**  
Six Month Safety and Efficacy of the BNT162b2 mRNA COVID-19 Vaccine
- Are you the corresponding author?**  
No.

## Certification

I certify that the information provided in this disclosure is complete and accurate.

Disclosure Purpose: 21-10345

## Summary of Interests

| Company or Organization         |            |                                              |
|---------------------------------|------------|----------------------------------------------|
| Entity                          | Type       | Interest Held By                             |
| <a href="#">Novartis Pharma</a> | Stock      | Self                                         |
| <i>Additional Information:</i>  |            |                                              |
| <a href="#">Pfizer Inc.</a>     | Employment | Self                                         |
| <i>Title:</i> Senior Director   |            | <i>Position Description:</i> Biostatistician |
| <i>Additional Information:</i>  |            |                                              |
| <a href="#">Pfizer Inc.</a>     | Stock      | Self                                         |
| <i>Additional Information:</i>  |            |                                              |

## Additional Questions:

- Are there other relationships or activities that readers could perceive to have influenced, or that give the appearance of potentially influencing, what you wrote in the submitted work?**  
No.
- What is the manuscript title?**  
Six Month Safety and Efficacy of the BNT162b2 mRNA COVID-19 Vaccine
- Are you the corresponding author?**  
No.

## Certification

I certify that the information provided in this disclosure is complete and accurate.

Disclosure Purpose: 21-10345

## Summary of Interests

### Company or Organization

| Entity                                                     | Type              | Interest Held By                                 |
|------------------------------------------------------------|-------------------|--------------------------------------------------|
| biontech                                                   | Fiduciary Officer | Self                                             |
| <i>Official Title:</i> Chief Executive Officer, Co-Founder |                   | <i>Position Description:</i> Member of the Board |
| <i>Additional Information:</i>                             |                   |                                                  |
| biontech                                                   | Stock             | Self                                             |
| <i>Additional Information:</i>                             |                   |                                                  |
| biontech                                                   | Stock Option      | Self                                             |
| <i>Additional Information:</i>                             |                   |                                                  |

### Intellectual Property

| Type                                                          | Is Licensed  | Interest Held By                                                                                                                                                                                                  |
|---------------------------------------------------------------|--------------|-------------------------------------------------------------------------------------------------------------------------------------------------------------------------------------------------------------------|
| Patent - 3 UTR Sequences for stabilisation of mRNA            | Yes          | Self                                                                                                                                                                                                              |
| <i>Description:</i> 3 UTR Sequences for stabilisation of mRNA |              | <i>Patent Number:</i> EPPCT/EP2015/073180, US 20190071682                                                                                                                                                         |
| <i>Patent Status:</i> Pending                                 |              | <i>Patent Holder:</i> Previous Institution                                                                                                                                                                        |
| <i>Filing Jurisdiction:</i> USA                               |              | <i>Additional Information:</i> I am co-inventors on various patents on RNA Technologies, both pending and granted, which have been filed over a period of 10+ years, some of which are licensed to third parties. |
| <i>Licensees:</i>                                             |              | Jurisdictions are Broad including US, EU, Asia.                                                                                                                                                                   |
| <b>Licensee</b>                                               | <b>Title</b> | <b>Date</b>                                                                                                                                                                                                       |
| biontech                                                      |              |                                                                                                                                                                                                                   |

## Additional Questions:

- Are there other relationships or activities that readers could perceive to have influenced, or that give the appearance of potentially influencing, what you wrote in the submitted work?  
No.
- What is the manuscript title?  
Six Month Safety and Efficacy of the BNT162b2 mRNA COVID-19 Vaccine
- Are you the corresponding author?  
No.

## Certification

I certify that the information provided in this disclosure is complete and accurate.

**Disclosure Purpose:** 21-10345

Summary of Interests

I do not have any interests to disclose at this time.

Additional Questions:

- 1. **Are there other relationships or activities that readers could perceive to have influenced, or that give the appearance of potentially influencing, what you wrote in the submitted work?**  
No.
- 2. **What is the manuscript title?**  
Six Month Safety and Efficacy of the BNT162b2 mRNA COVID-19 Vaccine,
- 3. **Are you the corresponding author?**  
No.

Certification

I certify that the information provided in this disclosure is complete and accurate.





**Disclosure Purpose:** 21-10345

## Summary of Interests

| Company or Organization                                                  |            |                                                               |
|--------------------------------------------------------------------------|------------|---------------------------------------------------------------|
| Entity                                                                   | Type       | Interest Held By                                              |
| Pfizer                                                                   | Employment | Self                                                          |
| <i>Title:</i> Director, Viral Vaccines<br><i>Additional Information:</i> |            | <i>Position Description:</i> vaccine research and development |
| Pfizer                                                                   | Stock      | Self                                                          |
| <i>Additional Information:</i>                                           |            |                                                               |

## Additional Questions:

- Are there other relationships or activities that readers could perceive to have influenced, or that give the appearance of potentially influencing, what you wrote in the submitted work?**  
No.
- What is the manuscript title?**  
Safety, Immunogenicity, and Efficacy of the BNT162b2 COVID-19 Vaccine in Adolescents
- Are you the corresponding author?**  
No.

## Certification

I certify that the information provided in this disclosure is complete and accurate.

Disclosure Purpose: 21-10345

Summary of Interests

**Company or Organization**

| Entity                                                                                                                                               | Type                       | Interest Held By                                                                         |
|------------------------------------------------------------------------------------------------------------------------------------------------------|----------------------------|------------------------------------------------------------------------------------------|
| <a href="#">Clover Biopharmaceuticals</a>                                                                                                            | End Point Review Committee | Self                                                                                     |
| <i>Category:</i> End Point Review Committee<br><i>Additional Information:</i> adjudicate covid cases reported during conduct of covid vaccine trial  |                            | <i>Description:</i> case adjudication committee                                          |
| <a href="#">Icosavax</a>                                                                                                                             | Data And Safety Monitoring | Self                                                                                     |
| <i>Category:</i> Data And Safety Monitoring<br><i>Additional Information:</i> on the DSMB for covid vaccine trial, no meetings yet                   |                            | <i>Description:</i> covid vaccine DSMB                                                   |
| <a href="#">Pfizer</a>                                                                                                                               | Consultant                 | Self                                                                                     |
| <i>Category:</i> Consultant<br><i>Additional Information:</i> 350/hr, one time consultation, contract expired 31 MAR 2021, no funds received to date |                            | <i>Description:</i> one time consultation for DEC 2020 VRBPAC preparation and attendance |

Additional Questions:

- Are there other relationships or activities that readers could perceive to have influenced, or that give the appearance of potentially influencing, what you wrote in the submitted work?**

Yes.

  - Please describe those relationships.**

for transparency, I am an investigator on the Pfizer phase 1,2,3 covid vaccine trial, the relationship is between Pfizer and my University
- What is the manuscript title?**

Six Month Safety and Efficacy of the BNT162b2 mRNA COVID-19 Vaccine
- Are you the corresponding author?**

No.

Certification

I certify that the information provided in this disclosure is complete and accurate.

Disclosure Purpose: 21-10345

Summary of Interests

**Company or Organization**

| Entity                                                          | Type       | Interest Held By             |
|-----------------------------------------------------------------|------------|------------------------------|
| Pfizer                                                          | Employment | Self                         |
| <i>Title:</i> Senior Director<br><i>Additional Information:</i> |            | <i>Position Description:</i> |
| Pfizer                                                          | Stock      | Self                         |
| <i>Additional Information:</i>                                  |            |                              |

Additional Questions:

- Are there other relationships or activities that readers could perceive to have influenced, or that give the appearance of potentially influencing, what you wrote in the submitted work?**  
No.
- What is the manuscript title?**  
Safety, Immunogenicity, and Efficacy of the BNT162b2 COVID-19 Vaccine in Adolescents
- Are you the corresponding author?**  
No.

Certification

I certify that the information provided in this disclosure is complete and accurate.

Disclosure Purpose: 21-10345

Summary of Interests

**Company or Organization**

| Entity                                                                                                                                                          | Type              | Interest Held By                                      |
|-----------------------------------------------------------------------------------------------------------------------------------------------------------------|-------------------|-------------------------------------------------------|
| biontech                                                                                                                                                        | Employment        | Self                                                  |
| <i>Title:</i> Chief Medical Officer<br><i>Additional Information:</i>                                                                                           |                   | <i>Position Description:</i> Board member, CO-founder |
| biontech                                                                                                                                                        | Fiduciary Officer | Self                                                  |
| <i>Official Title:</i> Chief Medical Officer<br><i>Additional Information:</i> also spouse is co-founder and board member (Chief Executive Officer) of Biontech |                   | <i>Position Description:</i> board member, co-founder |
| biontech                                                                                                                                                        | Fiduciary Officer | Spouse/Partner                                        |
| <i>Official Title:</i> CEO<br><i>Additional Information:</i>                                                                                                    |                   | <i>Position Description:</i>                          |
| biontech                                                                                                                                                        | Stock             | Spouse/Partner                                        |
| <i>Additional Information:</i> founder, shareholder                                                                                                             |                   |                                                       |
| biontech                                                                                                                                                        | Stock Option      | Self                                                  |
| <i>Additional Information:</i> self and spouse have stock Options. spouse has stock                                                                             |                   |                                                       |

**Intellectual Property**

| Type                                                                                                                                                                                                     | Is Licensed | Interest Held By                                                                                                                                                                               |      |          |  |  |  |  |
|----------------------------------------------------------------------------------------------------------------------------------------------------------------------------------------------------------|-------------|------------------------------------------------------------------------------------------------------------------------------------------------------------------------------------------------|------|----------|--|--|--|--|
| Patent - Modifications of RNA leading to increased transc ...                                                                                                                                            | Yes         | Self                                                                                                                                                                                           |      |          |  |  |  |  |
| <i>Description:</i> Modifications of RNA leading to increased transcript stability and translational efficiency<br><i>Patent Status:</i> Pending<br><i>Filing Jurisdiction:</i> USA<br><i>Licensees:</i> |             | <i>Patent Number:</i> EP1934345B9, DE102005046490.4<br><i>Patent Holder:</i> Current Institution<br><br><i>Additional Information:</i> self and spouse are co-inventors on patents on RNA Tech |      |          |  |  |  |  |
| <table border="1"> <thead> <tr> <th>Licensee</th> <th>Title</th> <th>Date</th> </tr> </thead> <tbody> <tr> <td>biontech</td> <td></td> <td></td> </tr> </tbody> </table>                                 | Licensee    | Title                                                                                                                                                                                          | Date | biontech |  |  |  |  |
| Licensee                                                                                                                                                                                                 | Title       | Date                                                                                                                                                                                           |      |          |  |  |  |  |
| biontech                                                                                                                                                                                                 |             |                                                                                                                                                                                                |      |          |  |  |  |  |

Additional Questions:

- Are there other relationships or activities that readers could perceive to have influenced, or that give the appearance of potentially influencing, what you wrote in the submitted work?  
No.
- What is the manuscript title?  
Six month safety and efficacy of the BNT162b2 mRNA COVID-19 vaccine
- Are you the corresponding author?  
No.

Certification

I certify that the information provided in this disclosure is complete and accurate.



**Disclosure Purpose:** 21-10345

## Summary of Interests

| Company or Organization                                                                                                           |                  |                                                                                 |
|-----------------------------------------------------------------------------------------------------------------------------------|------------------|---------------------------------------------------------------------------------|
| Entity                                                                                                                            | Type             | Interest Held By                                                                |
| <a href="#">Pfizer Turkey</a>                                                                                                     | Grant / Contract | Self                                                                            |
| <i>Recipient Name:</i> Serhat Unal<br><i>Grant / Contract Description:</i> Hacettepe University<br><i>Additional Information:</i> |                  | <i>Recipient Type:</i> Institution<br><i>Grant / Contract Purpose:</i> Research |

## Additional Questions:

- Are there other relationships or activities that readers could perceive to have influenced, or that give the appearance of potentially influencing, what you wrote in the submitted work?**  
No.
- What is the manuscript title?**  
Six Month Safety and Efficacy of the BNT162b2 mRNA COVID-19 Vaccine
- Are you the corresponding author?**  
No.

## Certification

I certify that the information provided in this disclosure is complete and accurate.

Disclosure Purpose: 21-10345

Summary of Interests

**Company or Organization**

| Entity                                                                           | Type       | Interest Held By                                                                      |
|----------------------------------------------------------------------------------|------------|---------------------------------------------------------------------------------------|
| Pfizer                                                                           | Employment | Self                                                                                  |
| <i>Title:</i> Sr. Director, Vaccine Statistics<br><i>Additional Information:</i> |            | <i>Position Description:</i> Design, conduct, and analysis of vaccine clinical trials |

Additional Questions:

- Are there other relationships or activities that readers could perceive to have influenced, or that give the appearance of potentially influencing, what you wrote in the submitted work?**  
No.
- What is the manuscript title?**  
Six Month Safety and Efficacy of the BNT162b2 mRNA COVID-19 Vaccine
- Are you the corresponding author?**  
No.

Certification

I certify that the information provided in this disclosure is complete and accurate.

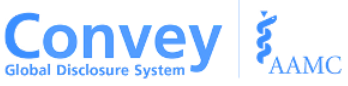

**Disclosure Purpose:** 21-10345

**Summary of Interests**

I do not have any interests to disclose at this time.

**Additional Questions:**

- 1. **Are there other relationships or activities that readers could perceive to have influenced, or that give the appearance of potentially influencing, what you wrote in the submitted work?**  
No.
- 2. **What is the manuscript title?**  
Six Month Safety and Efficacy of the BNT162b2 mRNA COVID-19 Vaccine
- 3. **Are you the corresponding author?**  
No.

**Certification**

I certify that the information provided in this disclosure is complete and accurate.

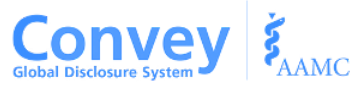



**Disclosure Purpose:** 21-10345

**Summary of Interests**

I do not have any interests to disclose at this time.

**Additional Questions:**

- 1. **Are there other relationships or activities that readers could perceive to have influenced, or that give the appearance of potentially influencing, what you wrote in the submitted work?**  
No.
- 2. **What is the manuscript title?**  
Six Month Safety and Efficacy of the BNT162b2 mRNA COVID-19 Vaccine
- 3. **Are you the corresponding author?**  
No.

**Certification**

I certify that the information provided in this disclosure is complete and accurate.



Supplement: NEJMoa2110345_disclosures.pdf [file NEJMoa2110345_disclosures.pdf]
